# Supplementary material for: Spectral sensitivity of cone photoreceptors and opsin expression in two colour-divergent lineages of the lizardCtenophorus decresii
Source: Oxford University Press journal article supplement (doi:10.1242/jeb.119404), 2015-01-01
Supplement: jeb119404supp.pdf [file jeb119404supp.pdf]

>sws1\_north\_c34173\_g1\_i2

ATGTCCGGAGAGGAAGACTTCTACCTCTTTGAAAACATCTCCTCGGTGGGGCCCTGGGATGGCCCCCA  
GTACCACATCGCCCCGATGTGGGCCTTCTACTTCCAGACAGCCTTCATGGGCTTCGTCTTCTTTGCTG  
GCACCCCGCTCAACGCCATCATCCTCTTGGTTACCGTCAAATACAAGAAGCTGCGCCAGCCGCTCAAC  
TACATCCTGGTCAACATCTCCTTCGCTGGCTTCTCTTTTTCGTCTTCTCCGTCTTACCCTCTTCTT  
AGCCAGCTCTCAAGGGTACTTCTTCTTTGGGAAACACATCTGTGCTTTGGAGGCTTTTCTCGGCTCCG  
TGGCAGGTCTGGTCACCGGCTGGTCCTTGGCGTTCCTTGCCTTCGAGCGCTACATCGTCATCTGCAAG  
CCGTTTGGGAACCTCCGTTTCAACTCCAAGCATGCCCTGCTGGTGGTGGCGGCCACGTGGTTCATCGG  
GATCGGGGTCTCCATCCCACCTTCTTCGGTTGGAGCAGGTTTCATCCCAGAGGGCCTCCAGTGCTCCT  
GCGGCCAGACTGGTACACCGTGGGGACCAAGTACAAGAGCGAATACTACACCTGGTTCCTCTTCATC  
TTTTGCTTCATCGTGCCCTTGACCCTCATTGTCTTCTCCTACTCCCAGCTTTTGGGTGCCCTCCGGGC  
CGTCGCGGCTCAGCAGCAGGAGTCGGCCACGACCCAGAAGGCTGAGCGGGAGGTTTCCCGCATGGTGG  
TGGTGATGGTGGGATCCTTCTGCATCTGCTACGTTCCCTATGCAGCCCTGGCCATGTACATGGTGAAC  
AACCGGGACCACGGCATAGACTTGCATGGTCCACCTCCCGCCTTCTTCTCCAAGAGCGCCTGTGT  
CTACAACCCCATATCTACTGCTTTATGAACAAACAGTTTCAGGGCTTGCATTATGGAAACGGTATGTG  
GCAAACCCATGACAGATGAATCCGACGTCTCGAGCTCAGCCCAGAAAACGGAGGTCTCCTCTGTCTCT  
TCCAGCCAAGTCAGCCCCAGCTAA

>sws1\_south\_c57193\_g2\_i2

ATGTCCGGAGAGGAAGACTTCTACCTCTTTGAAAACATCTCCTCGGTGGGGCCCTGGGATGGCCCCCA  
GTACCACATCGCCCCGATGTGGGCCTTCTACTTCCAGACAGCCTTCATGGGCTTCGTCTTCTTTGCTG  
GCACCCCGCTCAACGCCATCATCCTCTTGGTTACCGTCAAATACAAGAAGCTCCGGCAGCCACTCAAC  
TACATCCTAGTCAACATCTCCTTCGCGGGCTTCTCTTTTTCGTCTTCTCCGTCTTACCCTCTTCTT  
AGCCAGCTCTCAAGGGTACTTCTTCTTTGGGAAACACATCTGTGCTTTGGAGGCTTTTCTCGGCTCCG  
TGGCAGGTCTGGTCACCGGCTGGTCCTTGGCGTTCCTTGCCTTTGAGCGCTACATCGTCATCTGCAAG  
CCGTTTGGGAACCTCCGCTTCAACTCCAAGCATGCCCTGCTGGTGGTGGCGGCCACGTGGTTCATCGG  
GATCGGGGTCTCCATCCCACCTTCTTCGGTTGGAGCAGGTTTCATCCCAGAGGGCCTCCAGTGCTCCT  
GTGGCCAGACTGGTACACCGTGGGGACCAAGTACAAGAGCGAATACTACACCTGGTTCCTCTTCATC  
TTTTGCTTCATCGTGCCCTTGACCCTCATTGTCTTCTCCTACTCCCAGCTTTTGGGCGCCCTCCGGGC  
CGTCGAGCTCAGCAGCAGGAGTCAGCCACGACCCAGAAGGCTGAGCGGGAGGTTTCCCGCATGGTGG  
TGGTGATGGTGGGATCCTTCTGCATCTGCTACGTTCCCTATGCAGCCCTGGCCATGTACATGGTGAAC  
AACCGGGACCACGGCATAGACTTGCATGGTCCACCTCCCGCCTTCTTCTCCAAGAGCGCCTGTGT  
CTACAACCCCATATCTACTGCTTTATGAACAAACAGTTTCAGGGCTTGCATTATGGAAACGGTATGTG  
GCAAACCCATGACAGATGAGTCCGACGTCTCGAGCTCAGCCCAGAAAACGGAGGTCTCCTCTGTCTCT  
TCCAGCCAAGTCAGCCCCAGCTAA

>sws2\_north\_c36003\_g1\_i2

ATGCACTTGGACATTTCCCAACATTACAGCTCTCAGTCCCTTCTTAGTACCTCAGACTCATCTGGGTAG  
TCCAGGCCTCTTCATGGGCATGGCAGCCTTCATGTTCCCTGTTAATTGTTACTGGAGTGCCGATCAACG  
TCCTCACGATCTTCTGTACCTTCAAGTATAAGAAGCTCCGTTCCCATCTCAACTACATCTTGGTCAAC  
CTTGCTGTGTCAAATTTGCTGGTGGTCTGCATTGGATCTACCACCTCCTTCTACAGCTTCGCCCAGAT  
GTACTTCGCCCTGGGCCCCACTGCCTGCAAAATAGAGGGCTTTGCTGCTACTTTGGGGGTATGGTGA  
GTTTGTGGTCCCTGGCAGTTGTGGCTTTTGAACGATTCCCTGGTCATCTGCAAACCCCTAGGAACTTC  
ACATTCAGGGGCACCCATGCCATCATTGGTTGCGCTATTACCTGGGTCTTTGGTTTGGGGGCTGCATT  
ACCACCCATGTTTGGCTGGAGCAGATATATTCCTGAGGGACTGCAGTGCTCATGTGGCCCCGACTGGT  
ACACAACAACAACAAGTGGAAACAACGAGTCATATGTGTTGTTCCCTCTTCTGTTTCTGCTTTGGAGTG  
CCGCTGTTTATTATTGTCTTTTCATATGGTTCGTCTGCTTCTCACTTTGCGAGCTGTGGCCAAGCAGCA  
GGAGCAGTCAGCCACAACGCAGAAGGCTGAGAGGGAAAGTAACCAAGATGGTGGTGGTGGTGGTGGTGG  
GCTTCCCTGGTGTGTTGGATGCCATATGCCTCTTTTGCATTGTGGATAGTGACGCACCGTGGGGAACCC  
TTTGATGTCCGCTGGCTAGCATCCCCTCTGTCTTCTCCAAGGCCTCCTCAGTTTACAACCCCGTCAT  
CTATGTCTTCATGAACAAGCAGTTCCGCTCCTGTATGCTAAAGTTTGTCTTCTGTGGGAAAAGCCCT  
TTGGTGATGAAGATGATGTTTCGAGTTCCTCACAACCACCCAGGTCTCCTCTGTGTCTCCTCAGCCAA  
GTGTCCCCAGCGTAA

>sws2\_south\_c59986\_g3\_i6

ATGCACTTGGACATTCCCAACATTACAGCTCTCAGTCCCTTCTTAGTACCTCAGACTCATCTGGGTAG  
TCCAGGCCTCTTCATGGGCATGGCAGCCTTCATGTTCTGTAAATTGTTACTGGAGTGCCGATCAACG  
TCCTCACGATCTTCTGTACCTTCAAGTATAAGAAGCTCCGTTCCCATCTCAACTACATCTTGGTCAAC  
CTTGCTGTGTCAAATTTGCTGGTGGTCTGCATTGGATCTACCACCTCCTTCTACAGCTTCGCCCAGAT  
GTACTTCGCCCTGGGCCCCACTGCCTGCAAAATAGAGGGCTTTGCTGCTACTTTGGGGGGTATGGTGA  
GTTTGTGGTCCCTTGGCAGTTGTGGCTTTTTGAACGATTCCCTGGTCATCTGCAAACCCCTAGGAACTTC  
ACATTCAGGGGCACCCATGCCATCATTGGTTGCGCTATTACCTGGGTCTTTGGTTTGGGGGCTGCATT  
ACCACCCATGTTTGGCTGGAGCAGATATATTCCCTGAGGGACTGCAGTGCTCATGTGGCCCCGACTGGT  
ACACAACAACAACAAGTGAACAACGAGTCGTATGTGTTGTTCCCTCTTCTGTTTCTGCTTTGGAGTG  
CCGCTGTTTATTATTGTCTTTTTCATATGGTCGTCTGCTTCTCACTTTGCGGGCTGTGGCCAAGCAGCA  
GGAGCAGTCAGCCACAACGCAGAAGGCTGAGAGGGGAAGTAACCAAGATGGTGGTGGTATGGTATGG  
GCTTCCCTGGTGTGTTGGATGCCATATGCCTCTTTTGCATTGTGGATAGTGACGCACCGTGGGGAACCC  
TTTGATGTCCGCTGGCTAGCATCCCCTCTGTCTTCTCCAAGGCCTCCTCAGTTTACAACCCCGTCAT  
CTATGTCTTCATGAACAAGCAGTTCCGCTCCTGTATGCTAAAGTTTGTCTTCTGTGGGAAAAGCCCT  
TTGGTGATGAAGATGATGTTTCGAGTTCCTCACAAACCACCCAGGTCTCCTCTGTGTCTCCAGCCAA  
GTGTCCCCAGCGTAA

>rh2\_north\_c26193\_g1\_i1

ATGAATGGAACAGAAGGCATCAATTTCTATGTACCATTATCCAATAGAACAGGGCTGGTGCGGAGCCC  
CTTTGAATATCCCCAGTATTACCTAGCTGAACCCTGGAAGTACAACTTATATGCTGCTACATCTTTT  
TCCTCATCTTCACCGGGCTGCCATCAACCTCCTCACCCCTACTTGTGACCTTCAAACATAAGAAGTTA  
CGGCAGCCACTCAACTATATTTTGGTTAATCTTGCAGTAGCGGACCTCTTTATGGCCTGCTTTGGCTT  
CACCGTCACCTTCTACACAGCCTGGAATGGCTACTTCATATTTGGTCCCTGTTGGCTGTGCCATTGAGG  
GCTTCTTTGCAACATTGGGAGGTCAAGTTGCCCTCTGGTCCCTGGTTGTCTTGGCATTGAGCGGTAT  
ATAGTGGTCTGTAAACCTATGGGCAACTTCCGCTTCTCTTCCACCCATGCCATGCTAGGCATTGCTTT  
CACGTGGATTATGTCTGTATCCTGTGCAGCTCCACCTCTCTTTGGGTGGTCCAGGTATATAACCAGAAG  
GGATGCAATGTTCCCTGTGGTCCAGACTATTATACTCTCAACCCTGACTACCACAACGAGTCCTATGTT  
GTCTACATGTTTCTCATCCACTTTCTTATCCCTGTAGTGGTCATCTTCTTCTCCTATGGGCGGCTCAT  
TTGCAAAGTTTCGAGAGGCAGCTGCACAGCAGCAGGAGTCAGCCAGTACTCAAAGGCAGAAAAAGAAG  
TTACTCGCATGGTAATCTTGATGGTCCCTGGGATTTCTCCTTGCCTGGACTCCCTACGCTGTTGTGGCA  
TTCTGGATCTTACCAACAAGGGGCTGATTTTTCTGCTACACTCATGTCAGTGCCTGCTTTCTTCTC  
AAAGAGTTTCGTCCTCTATAATCCCATTATCTACGTCTCATGAACAAGCAGTTCCGTAATTGCATGA  
TCACCACAATCTGCTGTGGCAAGAACCCTTTGGTGATGAAGATGTCTCGTCAACGGTGTCCCAAAGC  
AAGACAGAGGTATCCTCTGTCTCTTCCAGCCAAGTGTACCTGCATAG

>rh2\_south\_c19264\_g1\_i1

ATGAATGGAACAGAAGGCATCAATTTCTATGTACCATTATCCAATAGAACAGGGCTGGTGCGGAGCCC  
CTTTGAATATCCCCAGTATTACCTAGCTGAACCCTGGAAGTACAACTTATATGCTGCTACATCTTTT  
TCCTCATCTTCACCGGGCTGCCATCAACCTCCTCACCCCTACTTGTGACCTTCAAACATAAGAAGTTA  
CGGCAGCCACTCAACTATATTTTGGTTAATCTTGCAGTAGCGGACCTCTTTATGGCCTGCTTTGGCTT  
CACCGTCACCTTCTACACAGCCTGGAATGGCTACTTCATATTTGGTCCCTGTTGGCTGTGCCATTGAGG  
GCTTCTTTGCAACATTGGGAGGTCAAGTTGCCCTCTGGTCCCTGGTTGTCTTGGCATTGAGCGGTAT  
ATAGTGGTCTGTAAACCTATGGGCAACTTCCGCTTCTCTTCCACCCATGCCATGCTAGGCATTGCTTT  
CACGTGGATTATGTCTGTATCCTGTGCAGCTCCACCTCTCTTTGGGTGGTCCAGGTATATAACCAGAAG  
GGATGCAATGTTCCCTGTGGTCCAGACTATTATACTCTCAACCCTGACTACCACAACGAGTCCTATGTT  
GTCTACATGTTTCTCATCCACTTTGTTATCCCTGTAGTGGTCATCTTCTTCTCCTATGGGCGGCTCAT  
TTGCAAAGTTTCGAGAGGCAGCTGCACAGCAGCAGGAGTCAGCCAGTACTCAAAGGCAGAAAAAGAAG  
TTACTCGCATGGTAATCTTGATGGTCCCTGGGATTTCTCCTTGCCTGGACTCCCTACGCTGTTGTGGCA  
TTCTGGATCTTACCAACAAGGGGCTGATTTTTCTGCTACACTCATGTCAGTGCCTGCTTTCTTCTC  
AAAGAGTTTCGTCCTCTATAATCCCATTATCTACGTCTCATGAACAAGCAGTTCCGTAATTGCATGA  
TCACCACAATCTGCTGTGGCAAGAACCCTTTGGTGATGAAGATGTCTCGTCAACGGTGTCCCAAAGC  
AAGACAGAGGTATCCTCTGTCTCTTCCAGCCAAGTGTACCTGCATAG

>lws\_north\_c30206\_g1\_i1

ATGACAGAAGCCTGGGATGTGGCTGTGTTTGGCTGCCCGGCGACGCAATGACGATGATGATACTACGAG  
GGACAGCGTATTTCACTTACACCAACAGCAACAACACCCGGGGCCCTTTTGAAGGTCCAAATTATCACA  
TTGCACCACGTTGGGTCTACAATATCACTTCTCTCTGGATGATCTTTGTGGTTATTGCCTCAGTCTTC  
ACCAATGGTTTTGGTATTGGTAGCCACTGCCAAATTCAAGAAGCTACGGCATCCACTCAACTGGATTCT  
GGTGAACCTTGGCAATAGCTGATCTGGGTGAGACCGTCATTGCCAGCACCATCAGCGTCATCAACCAGA  
TTTTCTGGCTATTTTCATCCTTGGCCATCCCATGTGTGTTTTGGAGGGATACACTGTGTCTGCTTGTGGC  
ATCACTGCCCTCTGGTCTTTGGCCATTATCTCCTGGGAGCGCTGGGTCTGTCTGCAAGCCTTTTGG  
AAATGTCAAGTTTTGATGCCAAACTGGCTATGGCTGGCATTGTCTTCTCCTGGGTGTGGTCCTGTGTCT  
GGACAGCACCACCATCTTTGGCTGGAGTAGGTACTGGCCCCATGGTCTGAAGACATCATGTGGTCCA  
GATGTGTTTCACTGGCAGCGATGACCCCGGTGTTCAATCTTACATGGTTGTCCTCATGATCACCTGTTG  
CTTCATTCCACTGGCTGTCAATTATCCTCTGCTACCTGCAAGTGTGGTTGGCTATTTCGTGCGGTTGCTG  
CCCAGCAGAAAGAGTCAGAATCTACACAGAAGGCTGAAAGGGAAGTGTCAAGGATGGTGGTTGTTCATG  
ATCATTGCCTATTGCTTCTGCTGGGGACCATAACACGGTCTTTGCCTGTTTTGCTGCTGCCAACCAGG  
CTATGCCTTCCACCCGCTTGCAGCTGCTCTGCCAGCCTACTTTGCAAAGAGCGCCACCATTTACAACC  
CGATTATCTATGTCTTCATGAACAGACAGTTCCGTAAGTGCATATTGCAACTCTTTGGCAAGAAGGTG  
GATGATGGCTCTGAATTATCTTCCACTTCCCCTACTGAGGTCTCCTCGGTCTCGAATTCTTCTGTATC  
ACCGGCATAA

>lws\_south\_c41875\_g1\_i2

ATGACAGAAGCCTGGGATGTGGCTGTGTTTGGCTGCCCGGCGACGCAATGACGATGATGATACTACGAG  
GGACAGCGTATTTTACTTACACCAACAGCAACAACACCCGGGGCCCTTTTGAAGGTCCAAATTATCACA  
TTGCACCACGTTGGGTCTACAATATCACTTCTCTCTGGATGATCTTTGTGGTTATTGCCTCAGTCTTC  
ACCAATGGTTTTGGTATTGGTAGCCACTGCCAAATTCAAGAAGCTACGGCATCCACTCAACTGGATTCT  
GGTGAACCTTGGCAATAGCTGATCTGGGTGAGACCGTCATTGCCAGCACCATCAGCGTCATCAACCAGA  
TTTTCTGGCTATTTTCATCCTTGGCCATCCCATGTGTGTTTTGGAGGGATACACTGTGTCTGCTTGTGGC  
ATCACTGCCCTCTGGTCTTTGGCCATTATCTCCTGGGAGCGCTGGGTCTGTCTGCAAGCCTTTTGG  
AAATGTCAAGTTTTGATGCCAAACTGGCTATGGCTGGCATTGTCTTCTCCTGGGTGTGGTCCTGTGTCT  
GGACAGCACCACCATCTTTGGCTGGAGTAGGTACTGGCCCCATGGTCTGAAGACATCATGTGGTCCA  
GATGTGTTTCACTGGCAGCGATGACCCCGGTGTTCAATCTTACATGGTTGTCCTCATGATCACCTGTTG  
CTTCATTCCACTGGCTGTCAATTATCCTCTGCTACCTGCAAGTGTGGTTGGCTATTTCGTGCGGTTGCTG  
CCCAGCAGAAAGAGTCAGAATCTACACAGAAGGCTGAAAGGGAAGTGTCAAGGATGGTGGTTGTTCATG  
ATCATTGCCTATTGCTTCTGCTGGGGACCATAACACGGTCTTTGCCTGTTTTGCTGCTGCCAACCAGG  
CTATGCCTTCCACCCCTTGCAGCTGCTCTGCCAGCCTACTTTGCAAAGAGCGCCACCATTTACAACC  
CGATTATCTATGTCTTCATGAACAGACAGTTCCGTAAGTGCATATTGCAACTCTTTGGCAAGAAGGTG  
GATGATGGCTCTGAATTATCTTCCACTTCCCCTACTGAGGTCTCCTCGGTCTCGAATTCTTCTGTATC  
ACCGGCATAA

>rh1\_north\_c26040\_g1\_i2

ATGAATGGAACAGAAGGCCAGAATTTCTACGTTCCCATGTCCAACAAGACTGGCGTTGTTCCGAGTCC  
ATTTGAGTACCCTCAGTATTATTTGGCAGACCCGTGGCAGTATTCTGCGCTGGCGGCTTACATGTTCC  
TCCTGATTCTTCTGGGATTTCCATCAACTTCTGACTCTATTTGTACCATCCAGCACAAGAACTC  
AGAACACCCCTGAACTACATCCTTCTAAATCTGGCCATAGCCAATCTCTTCATGGTCTTAATAGGCTT  
CACCCTACCATGTACACGTCTATGAATGGATATTTCAATTTTGGGACAATAGGCTGCAACATTGAAG  
GATTTCTTTGCTACAATGGGCGGTGAGATAGCCCTGTGGTCTCTGGTAGTCTTGGCTGTTGAAAGATAC  
GTGGTGGTCTGCAAGCCTATGAGCAATTTCCGTTTCACTGAGACCCATGCCATGATTGGGGTGGGTTT  
CACTTGGATCATGGCCTTGGCCTGTTCTGGTCTCCTCTCCTTGGATGGTCAAGATACATCCCAGAAG  
GTATGCAGTGTCTCATGTGGAGTTGATTATTATACACCAATCCTGAGACTAATAATGAGTCTTTTGTCT  
CTTTACATGTTTCTGGTCCATTTTGTACACACCATTGACTATTATCTTCTTCTGCTATGGACGCCTTGT  
CTGTGTAGTGAAACAGGCGGCAGCTCAGCAACAGGAATCTGCCACCACCCAGAAGGCTGAGAAAGAAG  
TAACTCGCATGGTTCATCATCATGGTCTTTTCTTCTGGTGGTGGTCCCTTATGCCAGTGTGGCT  
TTTTTATATCTTCACTCATCAAGGCTCGGACTTCGGCCCCGTCTTTATGACTATCCCGGCTTTCTTTGC  
CAAGAGTTCCGCAATCTACAATCCAGTGATTACATCCTAATGAATAAACAGTTCCGCAACTGTATGA  
TCACTACCCTCTGCTGTGGAAAGAATCCTTTAGGTGAAGAGGACACCTCTGCTGGCACCAAGACAGAG  
ACTTCCACAGTCTCCACAAGCCAAGTCTCCCCTGCCTAG

```
>rh1_south_c50738_g1_i2
ATGAATGGAAACAGAAGGCCAGAATTTCTACGTTCCCATGTCCAACAAGACTGGCGTTGTTCCGGAGTCC
ATTTGAGTACCCTCAGTATTATTTGGCAGACCCGTGGCAGTACTCTGCGCTGGCGGCTTACATGTTCC
TCCTGATTCTTCTGGGATTTCCCTATCAACTTTCTGACTCTCTTTGTCACCATCCAGCACAAAGAACTC
AGAACACCCCTGAACTACATCCTTCTAAATCTGGCCATAGCCAATCTCTTCATGGTCTTAATAGGCTT
CACCCTACCATGTACACGTCTATGAATGGATATTTTCAATTTTGGGACAATAGGCTGCAACATTGAAG
GATTCTTTGCTACAATGGGCGGTGAGATAGCCCTGTGGTCTCTGGTAGTCTTGGCTGTTGAAAGATAC
GTGGTGGTCTGCAAGCCTATGAGCAATTTCCGCTTCAGTGAGACCCATGCCATGATTGGGGTGGGTTT
CACTTGGATCATGGCCTTGGCCTGTTCTGGTCCTCCTCTCCTTGGATGGTCAAGATACATCCCAGAAG
GTATGCAGTGCTCATGTGGAGTTGATTATTATACACCAAATCCTGAGACTAATAATGAGTCCTTTGTC
CTTTACATGTTTCTGGTCCATTTTGTACACACCATTGACTATTATCTTCTTCTGCTATGGACGCCTTGT
CTGTGTAGTGAAACAGGCGGCAGCTCAGCAACAGGAATCTGCCACCACCAGAAGGCTGAGAAAGAAG
TAACTCGCATGGTCATCATCATGGTCTTTTCTCCTGGTTTGCTGGGTCCCTTATGCCAGTGTGGCT
TTTTATATCTTCACTCATCAAGGCTCGGACTTCGGCCCCGTCTTTATGACTATCCCGGCTTTCTTTGC
CAAGAGTTCGGCAATCTACAATCCAGTGATTTACATCCTAATGAATAAACAGTTCGGCAACTGTATGA
TCACTACCCTCTGCTGTGGAAAGAATCCTTTAGGTGAAGAGGACACCTCTGCTGGCACCAAGACAGAG
ACTTCCACAGTCTCCACAAGCCAAGTCTCCCCTGCGTAG
```

**Fig. S1. Amino acid sequences of the five opsin genes.**
